# Supplementary material for: Layer-by-layer assembly of L10-FePt nanoparticles with significant perpendicular magnetic anisotropy
Source: Royal Society of Chemistry journal article supplement (doi:10.1039/c4ce00657g), 2014-01-01
Supplement: c4ce00657g1.pdf [file c4ce00657g1.pdf]

## Supporting

### Part 1. Synthesis and of L1<sub>0</sub>-FePt nanoparticles, Film preparation and Characterization Methods

#### 1. Synthesis of L1<sub>0</sub>-FePt nanoparticles

The L1<sub>0</sub>-FePt nanoparticles were prepared by modifying a previously reported procedure in our group. In a typical procedure, platinum acetylacetonate (Pt(acac)<sub>3</sub>, 0.1 g, 0.25 mmol), oleylamine (OAm, 0.68 g), oleic acid (OA, 0.68 g), and 1-octadecene (ODE 10 mL) were put into a four-neck flask. The mixture was stirred at 80 °C and degased under vacuum. Subsequently, the mixture was heated up to 120 °C under an argon atmosphere, and was kept at this temperature for 2 min before Fe(CO)<sub>5</sub> (0.08 ml) was injected into the solution. The temperature was quickly raised to 220 °C and maintained for 20 min. The mixture was then heated to 300 °C at 10 °C/min and incubated at this temperature for 10 minutes before cooled down to room temperature. The product was rinsed twice and dispersed in hexane. This FePt/Fe<sub>3</sub>O<sub>4</sub> dispersion was stirred with magnesium(II) acetylacetonate hydrate (Mg(acac)<sub>2</sub>·2H<sub>2</sub>O, 700 mg), OAm (5 g), OA (1.33 g), and dibenzyl ether (20 mL) at 120 °C in an argon atmosphere. The mixture was heated up to 300 °C and maintained at this temperature for 60 minutes. After cooling down, the product was washed with ethanol/hexane and then annealed at 700 °C for 6 h in Ar/H<sub>2</sub> to obtain L1<sub>0</sub>-FePt/MgO NPs. The as-annealed L1<sub>0</sub>-FePt/MgO NPs were dissolved in ethanol at concentrations of 1mg/ml under ultrasonication. A moderate amount of concentrated HNO<sub>3</sub> was drop-cast into the dispersion. After 5 minutes, L1<sub>0</sub>-FePt NPs were precipitated by adding ethanol and redispersed in toluene (30 mL) with OA (0.5 mL), OAm (0.5 mL) and 1-Hexadecanethiol (0.5 mL) at 100 °C for 1h. Centrifugation was then applied to remove any undispersed residue. The as-synthesized L1<sub>0</sub>-FePt NPs were finally dispersed in toluene for further layer-by-layer assembly.

#### 2. Film preparation

A toluene dispersion of L1<sub>0</sub>-FePt NPs and an ethanol solution of polyethylenimine (PEI) were prepared at concentrations of 15 and 5 mg/mL, respectively. Prior to LbL assembly, the quartz or silicon substrates were cleaned with an Piranha solution (H<sub>2</sub>SO<sub>4</sub>/30%H<sub>2</sub>O<sub>2</sub> 7:3 v/v) and rinsed with Milli-Q water. Further purification was carried out by immersion in an RCA solution (H<sub>2</sub>O/NH<sub>3</sub>/H<sub>2</sub>O<sub>2</sub> 5:1:1 v/v/v) and thoroughly rinsed with distilled water followed by dried under a stream of nitrogen.

The substrate was immersed in ethanol PEI solution for 5min followed by rinsing with ethanol. The rinsing was done by dipping the substrates for 1 min each in three beakers containing ethanol, in order to remove excess PEI from the surface. The substrate was subsequently dried in gently-flowing nitrogen. The substrate was then dipped into toluene dispersion of the L1<sub>0</sub>-FePt nanoparticles for 10min. After the film was rinsed 3 times in toluene for 1min each, the substrate was then placed horizontally on a strong magnet with a magnetic field normal to the film surface immediately and dried with a gentle N<sub>2</sub> flow. By repeating this procedure in circular fashion, we can obtain (PEI/L1<sub>0</sub>-FePt)<sub>n</sub> multilayers assembly with desired number of layers.

#### 3. Characterization Methods

The samples were characterized by X-ray powder diffraction (XRD) with a Rigaku D/Max-2000 diffractometer (Cu Kα, λ=1.5406 Å). The elemental composition of the samples was estimated by ICP-AES of the solution obtained after digesting the samples in a HCl/HNO<sub>3</sub> mixture. The transmission electron microscopy (TEM) images were obtained by a Tecnai T20 transmission electron microscope operated at an acceleration voltage of 200 kV. TEM characterization of

PEI/L1<sub>0</sub>-FePt multilayer films were prepared on a carbon-coated copper grid with the same procedure as on quartz or silicon substrates. The HRTEM images were carried out on a FEI Tecnai F30 emission analytical transmission electron microscope operated at an acceleration voltage of 300 kV. A scanning electron microscope (FEI NanoSEM 430) was employed to characterize the film thickness of the PEI/L1<sub>0</sub>-FePt multilayer films and the accelerating voltage applied was 10 kV. Infrared spectra were recorded on a Nicolet Avatar FTIR spectrophotometer in the transmission and attenuated total reflection (ATR) modes. An ATR-FTIR spectrum was obtained from 256 scans with an incident angle of 45°C and plotted after baseline correction using spectrum analyzing software (OMNIC). UV-vis absorbance spectra of PEI/L1<sub>0</sub>-FePt multilayers on quartz glass were obtained by a Shimadzu UV-2550 UV-vis spectrometer system at the temperature of 23±2°C. Magnetic properties were studied using SQUID magnetometry (MPMS XL, Quantum Design).

## Part 2. Experimental Results

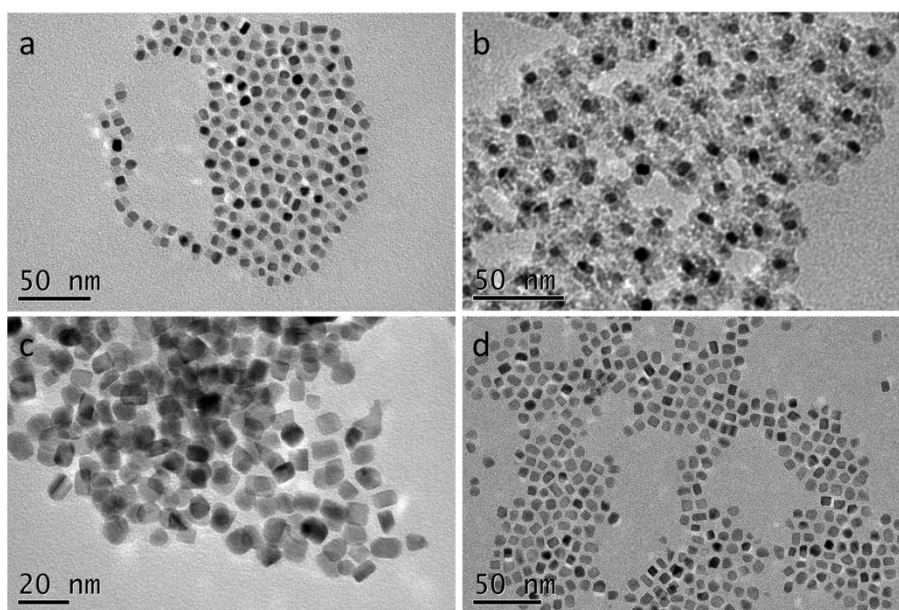

Figure S1 TEM images of the intermediate product in the synthesis process of L1<sub>0</sub>-FePt nanoparticles (a) fcc-FePt-Fe<sub>3</sub>O<sub>4</sub> NPs, (b) fcc-FePt-Fe<sub>3</sub>O<sub>4</sub>/MgO NPs, (c) L1<sub>0</sub>-FePt/MgO NPs, (d) L1<sub>0</sub>-FePt NPs,

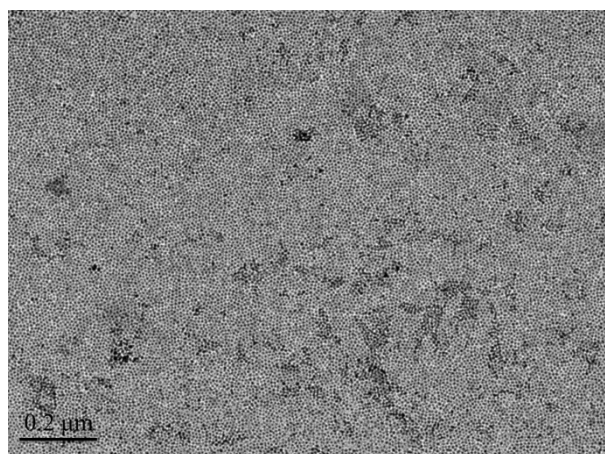

Figure S2 An overview TEM image L1<sub>0</sub>-FePt NP single layer assembled on PEI-coated TEM grids.

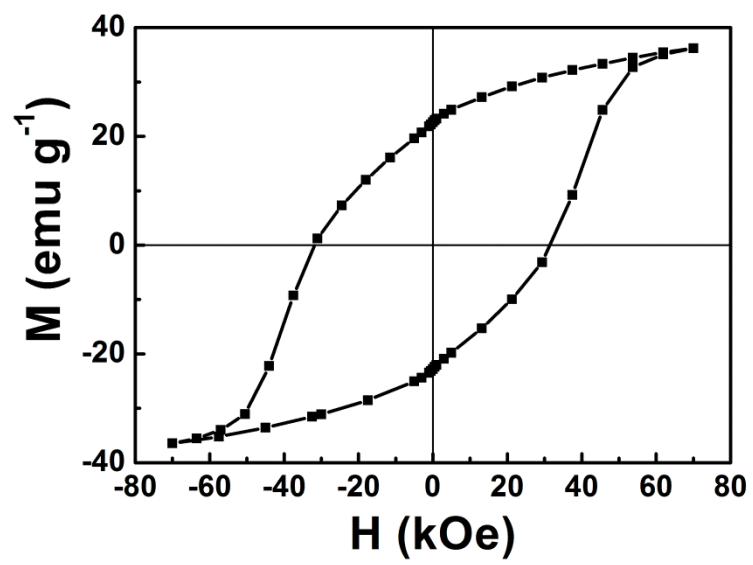

Figure S3 Room-temperature hysteresis loops of L1<sub>0</sub>-FePt powders.
